# Supplementary material for: Novel Application of Fluorescence Lifetime and Fluorescence Microscopy Enables Quantitative Access to Subcellular Dynamics in Plant Cells
Source: PubMed Central journal article supplement (PMC2683565; doi:10.1371/journal.pone.0005716), 2009-05-27

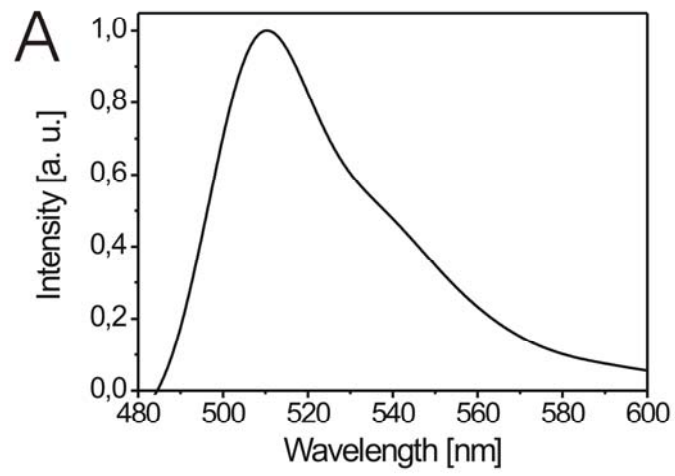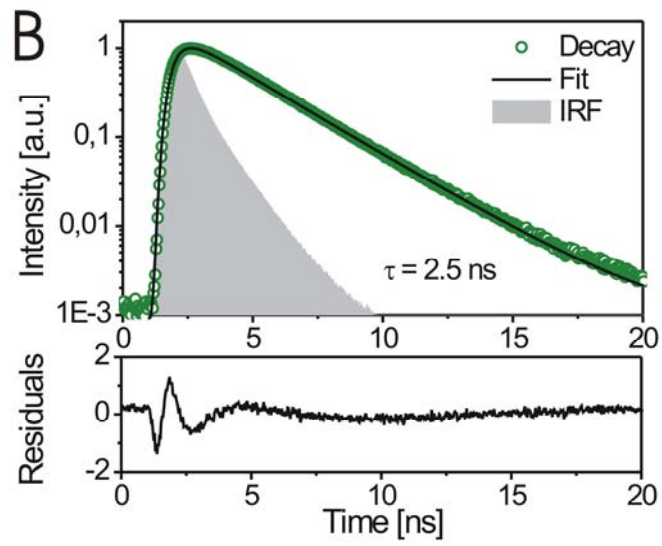

Supplement: pone.0005716.s001.pdf [file pone.0005716.s001.pdf]
