# Supplementary material for: Novel Application of Fluorescence Lifetime and Fluorescence Microscopy Enables Quantitative Access to Subcellular Dynamics in Plant Cells
Source: PubMed Central journal article supplement (PMC2683565; doi:10.1371/journal.pone.0005716), 2009-05-27
Supplement: pone.0005716.s008.pdf [file pone.0005716.s008.pdf]

**Suppl. Table 5** Statistics of 72 periclinal cell wall width measurements, each, derived from ultrathin TEM sections of BRI-GFP expressing, high-pressure-frozen root cells, which were either mock-treated or treated for 30 min with 10 nM BL. The statistical analysis revealed a cell wall width of  $62,5 \pm 10,8$  nm for the mock-treated and  $64,9 \pm 10,1$  nm for BL-treated seedlings. There is a weak difference with a p-value of 0,0845.

| <b>CWW [nm]</b>     | <b>CWW [nm]</b>   |
|---------------------|-------------------|
| <b>mock-treated</b> | <b>BL-treated</b> |
| 65,5                | 49,8              |
| 72,6                | 56,4              |
| 55,1                | 51,2              |
| 64,5                | 71,3              |
| 50,3                | 53,2              |
| 81,1                | 55,5              |
| 83,4                | 49,3              |
| 86,7                | 66,8              |
| 86,8                | 60,9              |
| 60,3                | 64,2              |
| 56,2                | 66,3              |
| 47,3                | 60,3              |
| 50,1                | 68,4              |
| 53,7                | 67,9              |
| 48,9                | 59,2              |
| 55,0                | 65,4              |
| 64,2                | 63,7              |
| 80,0                | 67,2              |
| 71,8                | 60,4              |
| 45,0                | 52,9              |
| 61,0                | 59,0              |
| 56,8                | 53,2              |
| 62,5                | 63,3              |
| 52,4                | 61,7              |
| 58,8                | 58,7              |
| 50,7                | 61,7              |
| 60,7                | 62,1              |
| 64,6                | 63,0              |
| 68,3                | 64,8              |
| 56,5                | 77,7              |
| 57,0                | 73,6              |
| 63,8                | 71,6              |
| 63,1                | 63,4              |

|                           |             |             |
|---------------------------|-------------|-------------|
|                           | 55,3        | 65,0        |
|                           | 65,3        | 73,3        |
|                           | 61,5        | 67,2        |
|                           | 58,6        | 50,5        |
|                           | 58,2        | 55,9        |
|                           | 50,6        | 74,1        |
|                           | 68,0        | 63,5        |
|                           | 49,0        | 53,0        |
|                           | 60,5        | 66,4        |
|                           | 56,7        | 59,1        |
|                           | 78,1        | 62,8        |
|                           | 48,1        | 63,1        |
|                           | 35,7        | 75,7        |
|                           | 68,1        | 65,0        |
|                           | 60,7        | 60,1        |
|                           | 60,4        | 75,5        |
|                           | 58,8        | 78,6        |
|                           | 54,0        | 81,9        |
|                           | 55,1        | 85,2        |
|                           | 57,2        | 94,2        |
|                           | 51,8        | 87,8        |
|                           | 50,6        | 48,9        |
|                           | 74,1        | 69,3        |
|                           | 67,0        | 48,8        |
|                           | 80,3        | 56,1        |
|                           | 67,3        | 56,2        |
|                           | 71,1        | 53,6        |
|                           | 82,2        | 59,6        |
|                           | 87,9        | 66,7        |
|                           | 79,3        | 67,6        |
|                           | 68,7        | 63,8        |
|                           | 63,3        | 63,5        |
|                           | 66,1        | 63,7        |
|                           | 56,8        | 74,4        |
|                           | 68,8        | 75,8        |
|                           | 56,9        | 91,7        |
|                           | 58,9        | 62,4        |
|                           | 66,8        | 85,7        |
|                           | 64,1        | 60,2        |
| <b>mean</b>               | <b>62,5</b> | <b>64,9</b> |
| <b>standard deviation</b> | <b>10,8</b> | <b>10,1</b> |
