# Supplementary material for: Novel Application of Fluorescence Lifetime and Fluorescence Microscopy Enables Quantitative Access to Subcellular Dynamics in Plant Cells
Source: PubMed Central journal article supplement (PMC2683565; doi:10.1371/journal.pone.0005716), 2009-05-27
Supplement: pone.0005716.s009.pdf [file pone.0005716.s009.pdf]

**Suppl. Table 6** FWHM changes in the widening of the plasmalemma-bound GFP fluorescence signal in aquaporin-GFP expressing hypocotyl and root cells before (0 min) and 30 min after application of 10 nM BL (30 min.). The statistical analysis revealed a change of the cell wall width by  $10 \pm 8 \%$  ( $n = 12$ ,  $p = 0,187$ ). The measurements were performed on 12 independent cells derived from 3 independent seedlings.

| <b>FWHM [<math>\mu\text{m}</math>]</b> | <b>FWHM [<math>\mu\text{m}</math>]</b> | <b>Expansion [%]</b> |
|----------------------------------------|----------------------------------------|----------------------|
| <b>0 min</b>                           | <b>30 min</b>                          |                      |
| 0,71                                   | 0,75                                   | 6                    |
| 0,78                                   | 0,92                                   | 18                   |
| 0,92                                   | 0,97                                   | 5                    |
| 0,81                                   | 0,89                                   | 10                   |
| 0,90                                   | 0,99                                   | 10                   |
| 0,77                                   | 0,80                                   | 4                    |
| 1,45                                   | 1,47                                   | 1                    |
| 1,22                                   | 1,24                                   | 2                    |
| 1,11                                   | 1,20                                   | 8                    |
| 1,04                                   | 1,36                                   | 31                   |
| 1,07                                   | 1,19                                   | 11                   |
| 1,47                                   | 1,67                                   | 14                   |
| <b>mean</b>                            |                                        | <b>10</b>            |
| <b>standard deviation</b>              |                                        | <b>8</b>             |
