# Supplementary material for: Novel Application of Fluorescence Lifetime and Fluorescence Microscopy Enables Quantitative Access to Subcellular Dynamics in Plant Cells
Source: PubMed Central journal article supplement (PMC2683565; doi:10.1371/journal.pone.0005716), 2009-05-27
Supplement: pone.0005716.s010.pdf [file pone.0005716.s010.pdf]

**Suppl. Table 7** FWHM changes in the expansion of the cell wall autofluorescence in wildtype hypocotyl and root cells before (0 min) and 30 min after application of 10 nM BL (30 min.). The statistical analysis revealed a change of the cell wall width by  $18 \pm 16$  % (n = 11, p = 0,2607). The measurements were performed on 11 independent cells derived from 3 independent seedlings.

| <b>FWHM [<math>\mu</math>m]</b> | <b>FWHM [<math>\mu</math>m]</b> | <b>Expansion [%]</b> |
|---------------------------------|---------------------------------|----------------------|
| <b>0 min</b>                    | <b>30 min</b>                   |                      |
| 0,73                            | 0,84                            | 15                   |
| 0,95                            | 1,12                            | 18                   |
| 1,32                            | 1,96                            | 48                   |
| 1,33                            | 1,54                            | 16                   |
| 0,66                            | 0,98                            | 48                   |
| 0,93                            | 0,95                            | 2                    |
| 3,10                            | 3,60                            | 16                   |
| 2,00                            | 2,27                            | 14                   |
| 2,96                            | 3,33                            | 13                   |
| 1,49                            | 1,52                            | 2                    |
| 2,50                            | 2,70                            | 8                    |
| <b>mean</b>                     |                                 | <b>18</b>            |
| <b>standard deviation</b>       |                                 | <b>16</b>            |
